# Supplementary material for: Assessing the Impact of Teacher-Led School-based Hygiene Intervention on Children's Handwashing Practices for Childhood Disease Prevention in Lagos, Nigeria: A Cluster Randomised Control Trial
Source: Research Square preprint supplement (doi:10.21203/rs.3.rs-8340366/v1), 2025-12-15
Supplement: Supplementary file 1 [file 40c66e41315dea2ff3de65cd.docx]

**Table 1:** **Socio-demographic Characteristics of Respondents**

| **Variable** | **Baseline** | | | |
| --- | --- | --- | --- | --- |
|  | **Frequency** | **Percent** | **Frequency** | **Percent** |
| **Age of Respondents** |  |  |  |  |
| 5-8 | 542 | 53.9 | 583 | 45.0 |
| 9-12 | 463 | 46.1 | 712 | 55.0 |
| **Total** | 1005 | 100.0 | 1295 | 100.0 |
| **Mean age ± S.D** | 8.2 ± 1.7 | – | 8.6 ± 1.8 | – |
| **Gender of Respondents** |  |  |  |  |
| Boys | 487 | 48.5 | 628 | 48.5 |
| Girls | 518 | 51.5 | 667 | 51.5 |
| **Total** | 1005 | 100.0 | 1295 | 100.0 |
| **Mother's Educational Level** |  |  |  |  |
| Graduate | 259 | 25.8 | 464 | 35.8 |
| SSCE | 223 | 22.2 | 194 | 15.0 |
| Primary School Leaver | 32 | 3.2 | 9 | .7 |
| None | 14 | 1.4 | 6 | 0.5 |
| I don't know | 477 | 47.5 | 622 | 48.0 |
| **Total** | 1005 | 100.0 | 1295 | 100.0 |
| **Mothers’ occupation** |  |  |  |  |
| Business and Management | 496 | 49.4 | 601 | 46.4 |
| Service Industry | 84 | 8.4 | 96 | 7.4 |
| Technology | 5 | 0.5 | 6 | 0.5 |
| Transportation and Logistics | 7 | 0.7 | 6 | 0.5 |
| Construction and Manufacturing | 4 | 0.4 | 2 | 0.2 |
| Creative Arts and Media | 112 | 11.1 | 188 | 14.5 |
| Education | 71 | 7.1 | 144 | 11.1 |
| Finance | 28 | 2.8 | 66 | 5.1 |
| Government and Public Service | 21 | 2.1 | 29 | 2.2 |
| Healthcare | 28 | 2.8 | 65 | 5.0 |
| Others | 148 | 14.7 | 88 | 6.8 |
| Religious | 1 | .1 | 4 | .3 |
| Clergy | 0 | 0 | 0 | 0 |
| **Total** | 1005 | 100.0 | 1295 | 100.0 |
| **Fathers’ Educational Level** |  |  |  |  |
| Graduate | 331 | 32.9 | 542 | 41.9 |
| SSCE | 174 | 17.3 | 113 | 8.7 |
| Primary School Leaver | 7 | 0.7 | 0 | 0 |
| None | 21 | 2.1 | 6 | .5 |
| I don't know | 472 | 47.0 | 634 | 49.0 |
| **Total** | 1005 | 100.0 | 1295 | 100.0 |
| **Fathers’ Occupation** |  |  |  |  |
| Business and Management | 390 | 38.8 | 474 | 36.6 |
| Service Industry | 96 | 9.6 | 137 | 10.6 |
| Technology | 5 | 0.5 | 5 | .4 |
| Transportation and Logistics | 64 | 6.4 | 81 | 6.3 |
| Construction and Manufacturing | 99 | 9.9 | 140 | 10.8 |
| Creative Arts and Media | 9 | 0.9 | 8 | 0.6 |
| Education | 17 | 1.7 | 26 | 2.0 |
| Finance | 52 | 5.2 | 74 | 5.7 |
| Government and Public Service | 30 | 3.0 | 63 | 4.9 |
| Others | 215 | 21.4 | 227 | 17.5 |
| Religious | 10 | 1.0 | 35 | 2.7 |
| Healthcare | 18 | 1.8 | 24 | 1.9 |
| **Total** | 1005 | 100.0 | 1295 | 100.0 |
| **Type of Family Structure** |  |  |  |  |
| Nuclear | 805 | 80.1 | 1103 | 85.2 |
| Extended | 200 | 19.9 | 192 | 14.8 |
| **School LGA** |  |  |  |  |
| Lagos Mainland | 61 | 6.1 | 98 | 7.6 |
| Shomolu | 397 | 39.5 | 699 | 54.0 |
| Ikeja | 486 | 48.4 | 247 | 19.1 |
| Surulere | 61 | 6.1 | 251 | 19.4 |
| **Total** | 1005 | 100.0 | 1295 | 100.0 |
